# Supplementary material
Source: PubMed Central journal article supplement (PMC3993136)
Supplement: AEM.03314-13_zam999105218so1.pdf [file AEM.03314-13_zam999105218so1.pdf]

TABLE S1. Bacterial strains and plasmids used in this work.

| Strain or plasmid           | Relevant genotype or phenotype                                                                                                                                                         | Source of reference                                           |
|-----------------------------|----------------------------------------------------------------------------------------------------------------------------------------------------------------------------------------|---------------------------------------------------------------|
| <b>Strains</b>              |                                                                                                                                                                                        |                                                               |
| <i>E. coli</i> strains      |                                                                                                                                                                                        |                                                               |
| DH5 $\alpha$                | <i>supE44</i> $\Delta$ <i>lacU169-(<math>\Psi</math>80<i>lacZ</i><math>\Delta</math><i>M15</i>)<i>hsdR1</i> <i>recA1</i><br/><i>gyrA96</i> <i>thi-1</i> <i>relA1</i></i>               | Bethesda Research Laboratories,<br>Inc., Gaithersburg, U.S.A. |
| S17-1                       | Sm <sup>r</sup> Sp <sup>r</sup> ; <i>hdsR</i> (RP4-2 <i>kan::Tn7</i> <i>tet::Mu</i> , integrated in<br>the chromosome)                                                                 | (1)                                                           |
| <i>B. japonicum</i> strains |                                                                                                                                                                                        |                                                               |
| 110 <i>spc4</i>             | Sp <sup>r</sup> ; wild type                                                                                                                                                            | (2)                                                           |
| 6243                        | Sp <sup>r</sup> Km <sup>r</sup> ; $\Delta$ <i>bll3156-3157::aphII</i> (same orientation)                                                                                               | This work                                                     |
| <b>Plasmids</b>             |                                                                                                                                                                                        |                                                               |
| pGEM-T Easy                 | Ap <sup>r</sup> ; cloning vector                                                                                                                                                       | Promega Corporation,<br>Madison, U.S.A.                       |
| pBSL15                      | Ap <sup>r</sup> Km <sup>r</sup> ; cloning vector                                                                                                                                       | (3)                                                           |
| pSUP202 <i>pol4</i>         | Tc <sup>r</sup> ; (pSUP202) part of the polylinker from<br>pBlueskript II KS+ between <i>EcoRI</i> and <i>PstI</i>                                                                     | (4)                                                           |
| pRJ6240                     | Ap <sup>r</sup> ; (pGEM-T Easy) 623 bp amplicon of the <i>bll3156</i><br>downstream region comprising the <i>B. japonicum</i><br>genome sequence from coordinate 3489814 to<br>3490437 | This work                                                     |
| pRJ6241                     | Ap <sup>r</sup> ; (pGEM-T Easy) 636 bp amplicon of the <i>bll3157</i><br>upstream region comprising the <i>B. japonicum</i><br>genome sequence from coordinate 3493519 to<br>3494155   | This work                                                     |
| pRJ6242                     | Tc <sup>r</sup> ; (pSUP202 <i>pol4</i> ) 1259 bp <i>EcoRI/NotI</i> up- and<br>downstream region of <i>bll3156-bll3157</i>                                                              | This work                                                     |
| pRJ6243                     | Tc <sup>r</sup> Km <sup>r</sup> ; (pSUP202 <i>pol4</i> ) the <i>aphII</i> cassette flanked<br>by the up-and downstream region of <i>bll3156-bll3157</i>                                | This work                                                     |

1. **Simon R, Priefer U, Pühler A.** 1983. Vector plasmids for *in vivo* and *in vitro* manipulation of gram-negative bacteria. Springer Verlag, Heidelberg, Germany.
2. **Regensburger B, Hennecke H.** 1983. RNA polymerase from *Rhizobium japonicum*. Arch Microbiol **135**:103-109.
3. **Alexeyev MF.** 1995. Three kanamycin resistance gene cassettes with different polylinkers. Biotechniques **18**:52-56.
4. **Fischer HM, Babst M, Kaspar T, Acuna G, Arigoni F, Hennecke H.** 1993. One member of a *groESL*-like chaperonin multigene family in *Bradyrhizobium japonicum* is co-regulated with symbiotic nitrogen fixation genes. EMBO J **12**:2901-2912.

TABLE S2. Specific nitrogenase activity (% C<sub>2</sub>H<sub>4</sub> min<sup>-1</sup> g<sup>-1</sup>) of *B. japonicum* wild type and 6243 mutant on soybean, mungbean, cowpea and siratro plants.

|                 | Relevant genotype | Soybean   | Mungbean  | Cowpea    | Siratro   |
|-----------------|-------------------|-----------|-----------|-----------|-----------|
| 110 <i>spc4</i> | Wild type         | 1.9 ± 0.7 | 1.9 ± 0.9 | 2.5 ± 0.7 | 1.7 ± 0.8 |
| 6243            | <i>Δfrc-oxc</i>   | 1.7 ± 1.2 | 2.2 ± 0.8 | 2.9 ± 1.7 | 1.2 ± 0.7 |
